# Supplementary material for: Age and performance at fledging are a cause and consequence of juvenile mortality between life stages
Source: PubMed Central journal article supplement — Sci Adv. 2018 Jun 20;4(6):eaar1988. doi: 10.1126/sciadv.aar1988 (PMC6010335; doi:10.1126/sciadv.aar1988), 2018-06-20
Supplement: aar1988_SM.pdf [file aar1988_SM.pdf]

# Science Advances

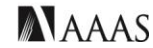

[advances.sciencemag.org/cgi/content/full/4/6/ear1988/DC1](https://advances.sciencemag.org/cgi/content/full/4/6/ear1988/DC1)

## Supplementary Materials for

### **Age and performance at fledging are a cause and consequence of juvenile mortality between life stages**

Thomas E. Martin, Bret Tobalske, Margaret M. Riordan, Samuel B. Case, Kenneth P. Dial

Published 20 June 2018, *Sci. Adv.* **4**, ear1988 (2018)

DOI: 10.1126/sciadv.aar1988

#### **This PDF file includes:**

- table S1. Average fledging ages and numbers of fledglings followed with radio transmitters to determine fledgling mortality rates for eight songbird species.

**table S1. Average fledging ages and numbers of fledglings followed with radio transmitters to determine fledgling mortality rates for eight songbird species.**

---

| Common Name            | Scientific Name               | Average fledging age (d) | Numbers of fledglings followed with radio transmitters |
|------------------------|-------------------------------|--------------------------|--------------------------------------------------------|
| Spotted Towhee         | <i>Pipilo maculatus</i>       | 9.39                     | 36                                                     |
| Green-tailed Towhee    | <i>Pipilo chlorurus</i>       | 9.60                     | 39                                                     |
| Red-faced Warbler      | <i>Cardellina rubrifrons</i>  | 11.02                    | 58                                                     |
| Gray-headed Junco      | <i>Junco hyemalis</i>         | 11.35                    | 224                                                    |
| Cordilleran Flycatcher | <i>Empidonax occidentalis</i> | 15.05                    | 34                                                     |
| House Wren             | <i>Troglodytes aedon</i>      | 18.23                    | 133                                                    |
| Western Bluebird       | <i>Sialia mexicana</i>        | 19.25                    | 95                                                     |
| Mountain Chickadee     | <i>Poecile gambeli</i>        | 21.36                    | 70                                                     |

---
